# Supplementary material for: Quantification of surface water volume changes in the Mackenzie Delta using satellite multi-mission data
Source: Copernicus journal article supplement (doi:10.5194/hess-22-1543-2018), 2018-02-28

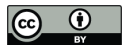

*Supplement of*

## **Quantification of surface water volume changes in the Mackenzie Delta using satellite multi-mission data**

**Cassandra Normandin et al.**

*Correspondence to:* Cassandra Normandin ([cassandra.normandin@u-bordeaux.fr](mailto:cassandra.normandin@u-bordeaux.fr))

The copyright of individual parts of the supplement might differ from the CC BY 3.0 License.

**Figure S1: Index map and associated histogram in July 2013 for (a) EVI for MODIS, (b) EVI for OLI 500, (c) LSWI for MODIS and (d) LSWI for OLI 500**

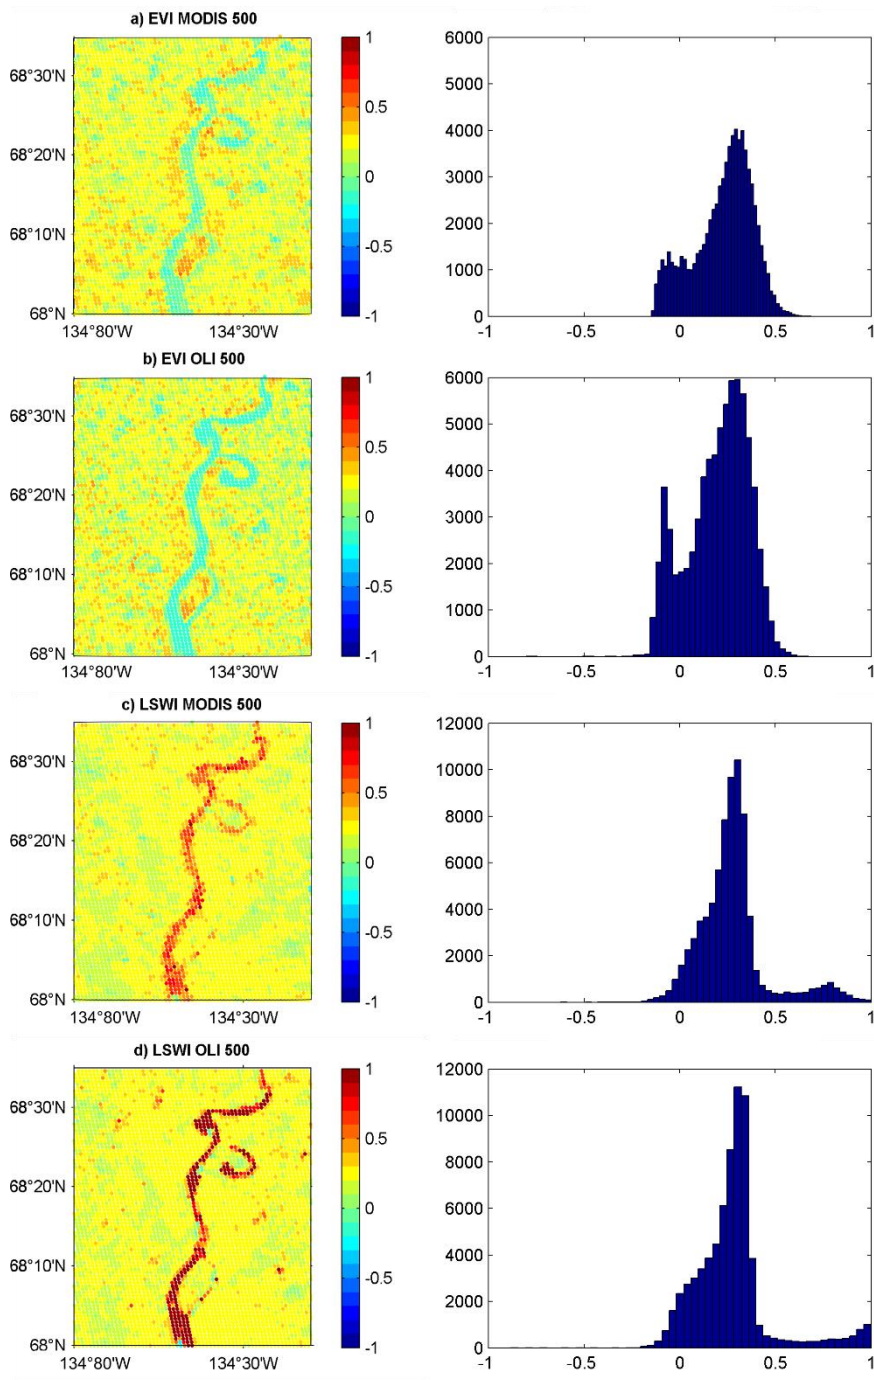

Figure S2: Map of difference between EVI and LSWI indices and associated histogram in July 2013 for (a) MODIS and (b) OLI 500

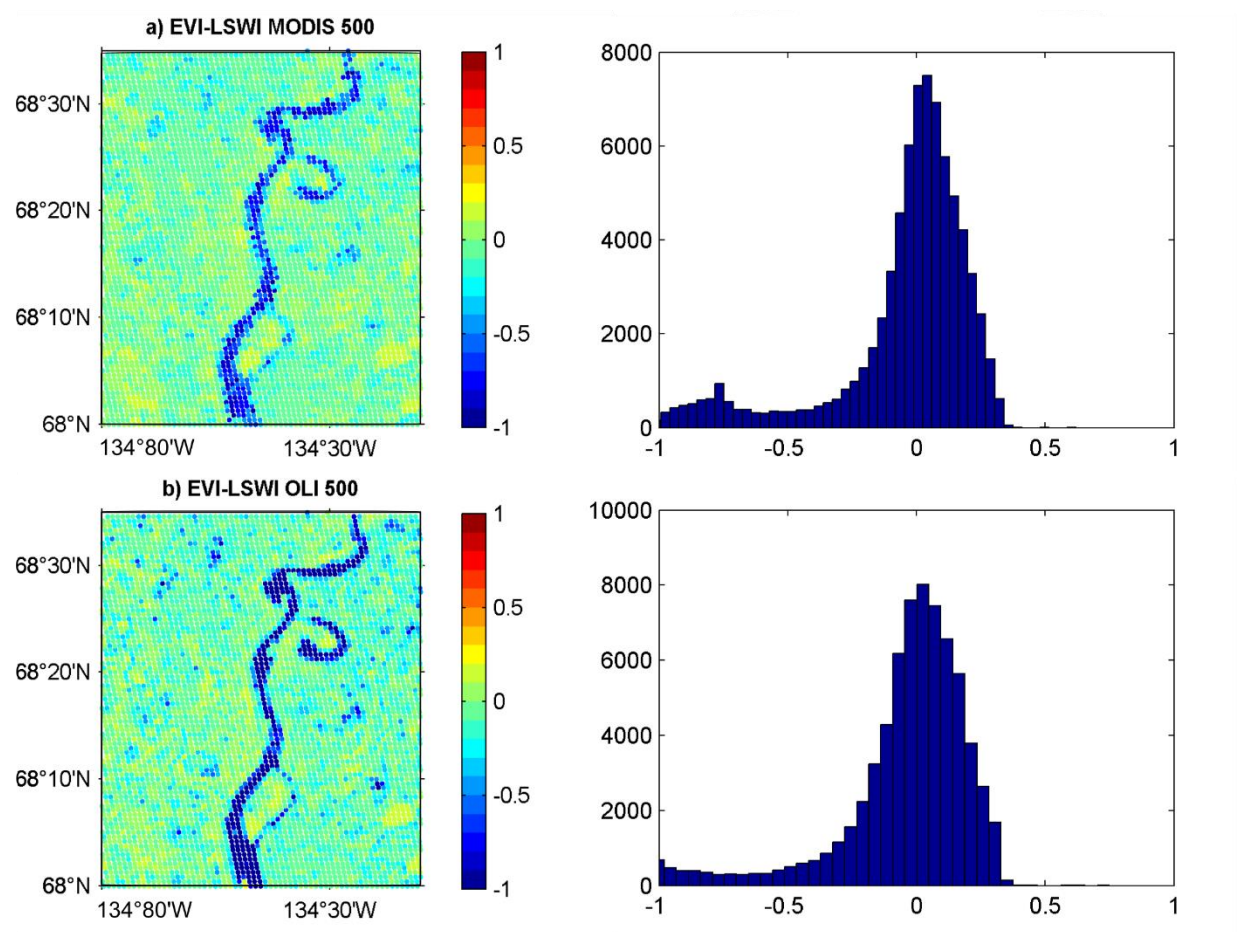

**Figure S3: Surface water extent estimated in July 2013 using (a) MODIS at 500 m (b) OLI at 500 m and (c) OLI at 30 m. Permanent water bodies appear in blue and inundated areas in light blue.**

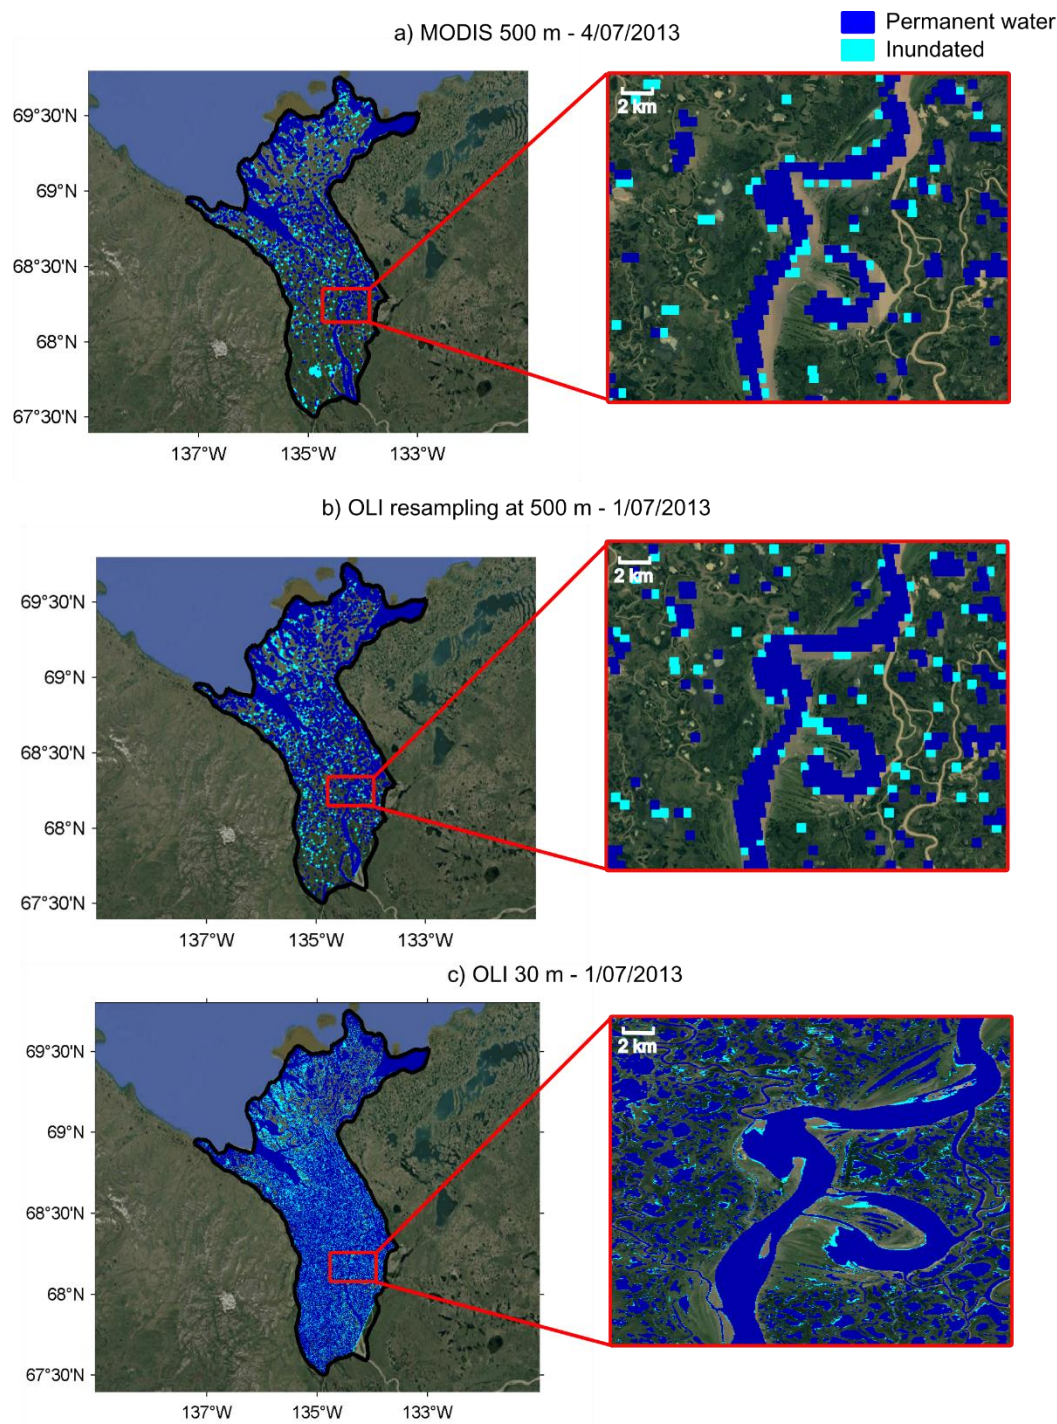



**Figure S4: Comparisons of surface water areas detected using MODIS at 500 m and Landsat-8 images resampled at 500 m of spatial resolution for Landsat-8 images acquired on 04/07/2013 (a) and 05/08/2013 (b). Surface water only detected using MODIS, Landsat-8 resampled and detected by both appears in blue, light blue and yellow respectively.**

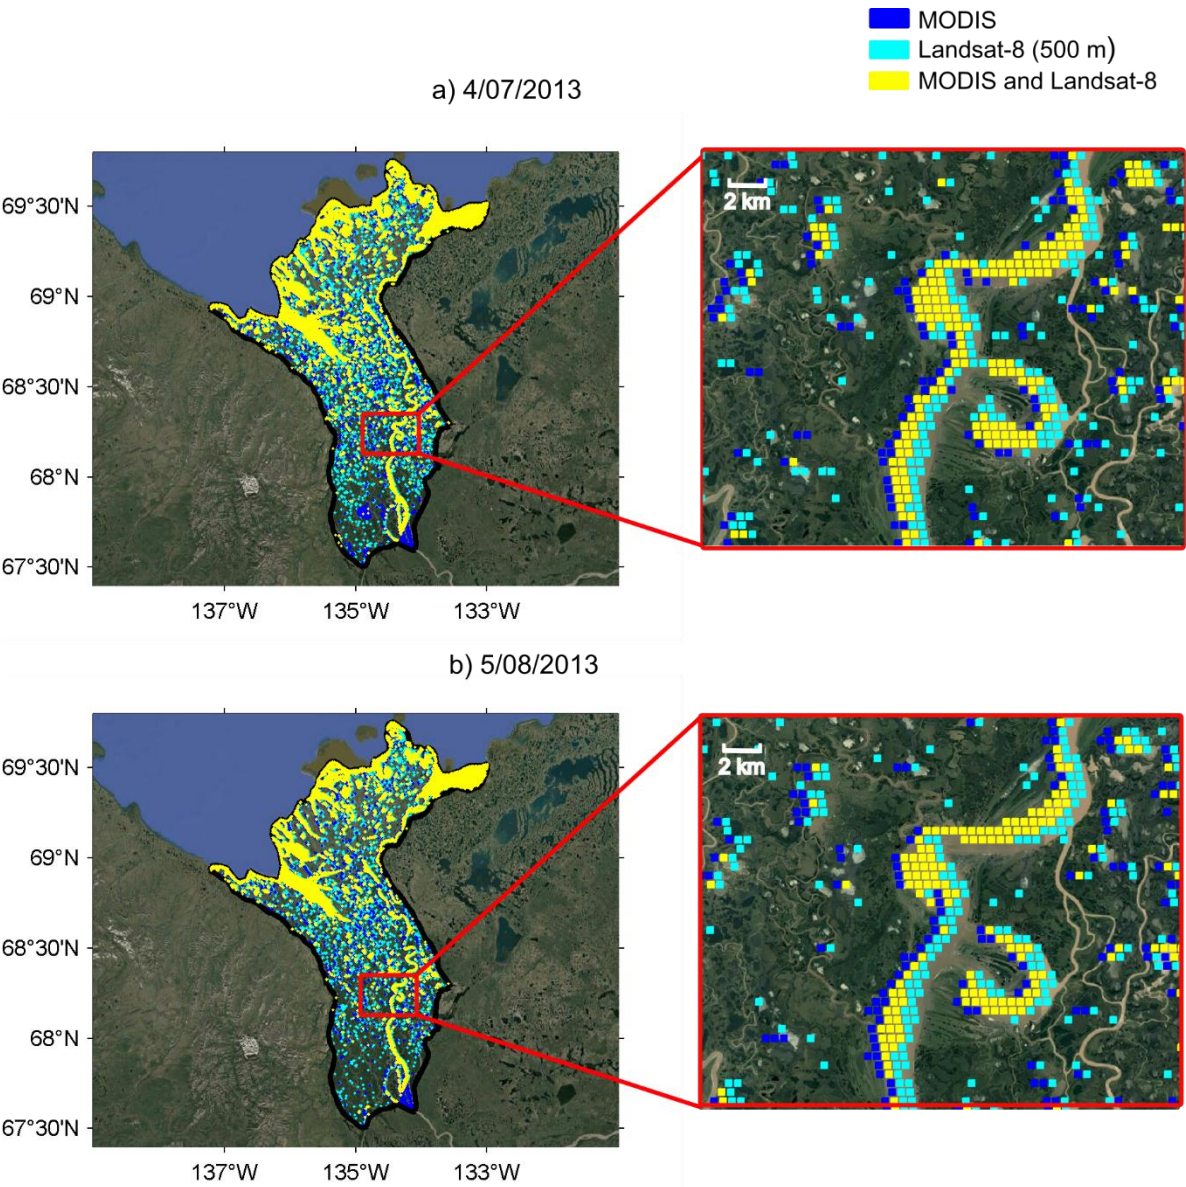

Supplement: Supplementary file 1 [file hess-22-1543-2018-supplement.pdf]
